# Supplementary material for: A two-way coupled regional urban–street network air quality model system for Beijing, China
Source: Copernicus journal article supplement (doi:10.5194/gmd-16-5585-2023), 2023-10-10
Supplement: Supplementary file 1 [file gmd-16-5585-2023-supplement.pdf]

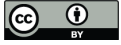

*Supplement of*

## **A two-way coupled regional urban–street network air quality model system for Beijing, China**

**Tao Wang et al.**

*Correspondence to:* Jie Li ([lijie8074@mail.iap.ac.cn](mailto:lijie8074@mail.iap.ac.cn)) and Zifa Wang ([zifawang@mail.iap.ac.cn](mailto:zifawang@mail.iap.ac.cn))

The copyright of individual parts of the supplement might differ from the article licence.

**Table S1.** Statistical analysis of simulation and observation O<sub>3</sub>, NO, and NO<sub>2</sub> concentration at stations during the study period using the two-way coupled model (S1: IAQMS-street v2.0), one-way coupled model (S2: IAQMS-street v1.0), and regional model (S3: NAQPMS).

| Station         | Model             | observation<br>( $\mu\text{g}/\text{m}^3$ ) | simulation<br>( $\mu\text{g}/\text{m}^3$ ) | R     | FAC2 | NMB   | RMSE<br>( $\mu\text{g}/\text{m}^3$ ) |
|-----------------|-------------------|---------------------------------------------|--------------------------------------------|-------|------|-------|--------------------------------------|
| DC              | IAQMS-street v2.0 | 90.85                                       | 91.56                                      | 0.77  | 0.81 | 0.01  | 33.42                                |
|                 | O <sub>3</sub>    | IAQMS-street v1.0                           | 82.74                                      | 0.76  | 0.84 | -0.09 | 36.91                                |
|                 |                   | NAQPMS                                      |                                            | 61.81 | 0.52 | 0.59  | -0.32                                |
| NO              | IAQMS-street v2.0 | 0.57                                        | 0.80                                       | 0.36  | 0.13 | 0.41  | 1.71                                 |
|                 | IAQMS-street v1.0 |                                             | 0.22                                       | 0.24  | 0.04 | -0.61 | 1.59                                 |
|                 | NAQPMS            |                                             | 3.73                                       | 0.33  | 0.02 | 5.56  | 5.96                                 |
| NO <sub>2</sub> | IAQMS-street v2.0 | 18.53                                       | 23.16                                      | 0.32  | 0.75 | 0.25  | 14.21                                |
|                 | IAQMS-street v1.0 |                                             | 27.07                                      | 0.43  | 0.75 | 0.47  | 15.69                                |
|                 | NAQPMS            |                                             | 36.53                                      | 0.16  | 0.41 | 0.98  | 27.00                                |
| XC              | IAQMS-street v2.0 | 86.11                                       | 93.27                                      | 0.79  | 0.85 | 0.08  | 30.18                                |
|                 | O <sub>3</sub>    | IAQMS-street v1.0                           | 81.30                                      | 0.79  | 0.87 | -0.06 | 29.56                                |
|                 |                   | NAQPMS                                      |                                            | 64.95 | 0.58 | 0.68  | -0.25                                |
| NO              | IAQMS-street v2.0 | 0.64                                        | 0.77                                       | 0.33  | 0.21 | 0.21  | 1.53                                 |
|                 | IAQMS-street v1.0 |                                             | 0.24                                       | 0.33  | 0.05 | -0.63 | 1.26                                 |
|                 | NAQPMS            |                                             | 4.12                                       | 0.41  | 0.06 | 5.48  | 6.60                                 |
| NO <sub>2</sub> | IAQMS-street v2.0 | 18.73                                       | 23.07                                      | 0.33  | 0.64 | 0.23  | 14.82                                |
|                 | IAQMS-street v1.0 |                                             | 28.89                                      | 0.46  | 0.66 | 0.55  | 17.64                                |
|                 | NAQPMS            |                                             | 36.34                                      | 0.18  | 0.43 | 0.94  | 27.31                                |

**Table S2.** The population-weighted average concentration of O<sub>3</sub>, NO, and NO<sub>2</sub> simulated by the tow-way coupled model (IAQMS-street v2.0), one-way coupled model (IAQMS-street v1.0), and regional model (NAQPMS) during August, 2021 in Beijing.

| Model             | O <sub>3</sub><br>( $\mu\text{g}/\text{m}^3$ ) | NO<br>( $\mu\text{g}/\text{m}^3$ ) | NO <sub>2</sub><br>( $\mu\text{g}/\text{m}^3$ ) |
|-------------------|------------------------------------------------|------------------------------------|-------------------------------------------------|
| IAQMS-street v2.0 | 99.08                                          | 0.79                               | 16.64                                           |
| IAQMS-street v1.0 | 109.74                                         | 0.12                               | 3.75                                            |
| NAQPMS            | 100.78                                         | 1.50                               | 20.13                                           |

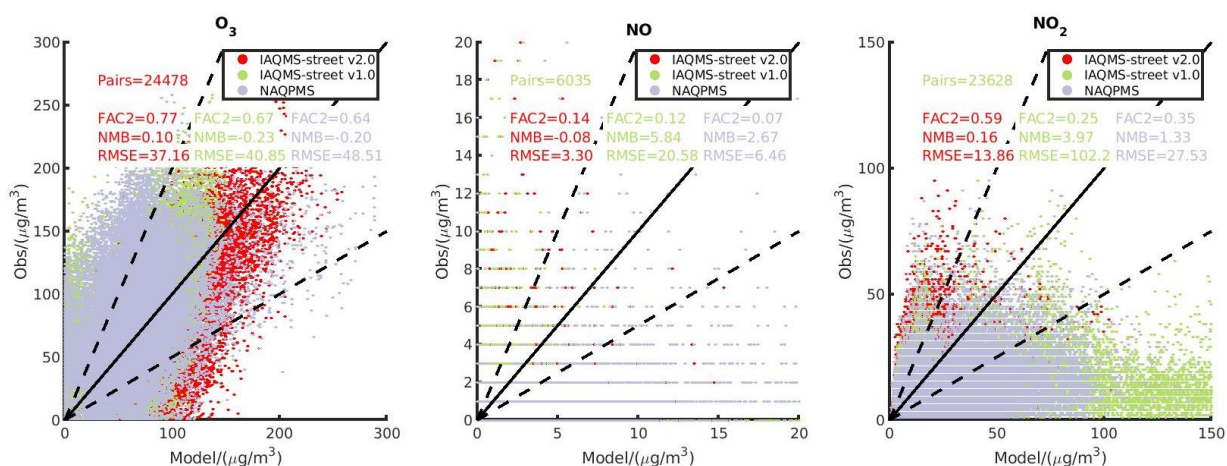

**Figure S1.** Observed and simulated hourly O<sub>3</sub>, NO, and NO<sub>2</sub> concentrations during August 2021 from different models (IAQMS-street v2.0: red points; IAQMS-street v1.0: green points; NAQPMS: blue points) at all pollutant monitoring stations in Beijing.

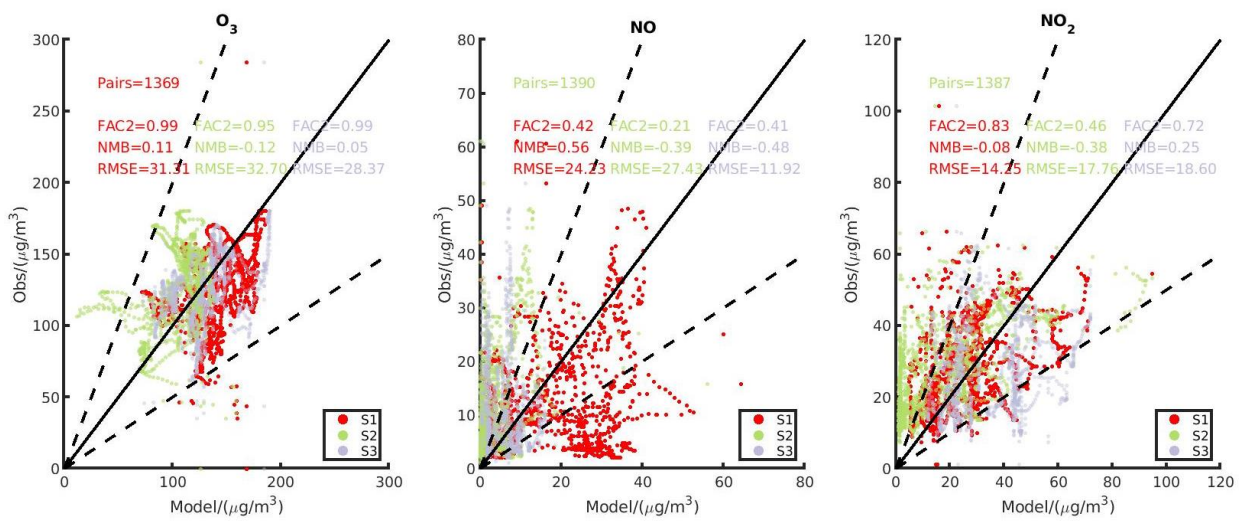

**Figure S2.** The simulated and observed concentration of O<sub>3</sub>, NO, and NO<sub>2</sub> on the street scale in two-way coupled model (S1: IAQMS-street v2.0), one-way coupled model (S2: IAQMS-street v1.0), and regional model (S3: NAQPMS).

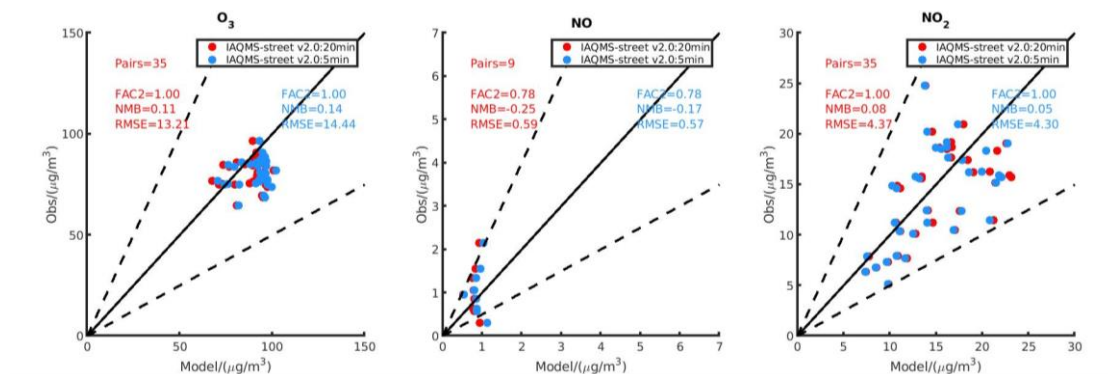

**Figure S3.** Observed and simulated average O<sub>3</sub>, NO, and NO<sub>2</sub> concentrations during August 2021 from IAQMS-street v 2.0 with different time step (20 min: red points; 5min: blue points) at all pollutant monitoring stations in Beijing.

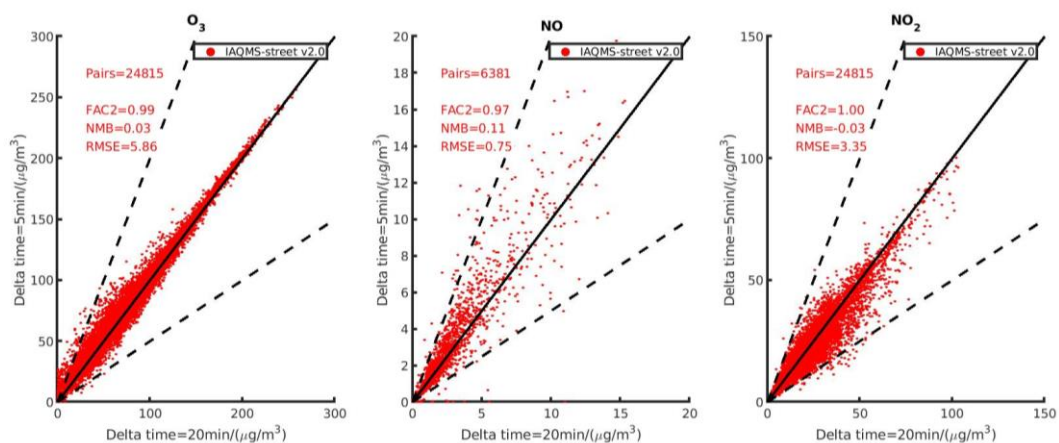

**Figure S4.** The comparison of simulated hourly  $O_3$ ,  $NO$ , and  $NO_2$  concentrations during August 2021 from IAQMS-street v 2.0 with different time step (20 min and 5 min) at all pollutant monitoring stations in Beijing.
